# Supplementary material for: Trends in Cardiovascular Mortality Related to Atrial Fibrillation in the United States, 2011 to 2018
Source: PubMed Central journal article supplement — J Am Heart Assoc. 2021 Jul 28;10(15):e020163. doi: 10.1161/JAHA.120.020163 (PMC8475678; doi:10.1161/jaha.120.020163), 2021-07-28
Supplement: JAH3-10-e020163-s001.pdf [file JAH3-10-e020163-s001.pdf]

# **SUPPLEMENTAL MATERIAL**

**Table S1. Age-group specific risk for cardiovascular death related to atrial fibrillation,**

| Age Groups (years) | 2011              |                               | 2014              |                               | 2018              |                               |
|--------------------|-------------------|-------------------------------|-------------------|-------------------------------|-------------------|-------------------------------|
|                    | Deaths/Population | Crude Mortality Rate (95% CI) | Deaths/Population | Crude Mortality Rate (95% CI) | Deaths/Population | Crude Mortality Rate (95% CI) |
| 35 - 44            | 117/40627954      | 0.29 (0.24 - 0.34)            | 131/40513133      | 0.32 (0.27 - 0.38)            | 187/41277888      | 0.45 (0.39 - 0.52)            |
| 45 - 54            | 567/44718203      | 1.27 (1.16 - 1.37)            | 735/43458851      | 1.69 (1.57 - 1.81)            | 892/41631699      | 2.14 (2 - 2.28)               |
| 55 - 64            | 2342/38062140     | 6.15 (5.9 - 6.4)              | 2976/40077581     | 7.43 (7.16 - 7.69)            | 4043/42272636     | 9.56 (9.27 - 9.86)            |
| 65 - 74            | 6155/22481738     | 27.38 (26.7 - 28.1)           | 8102/26398290     | 30.69 (30.0 - 31.4)           | 11449/30492316    | 37.55 (36.86 - 38.2)          |
| 75 - 84            | 18669/13175230    | 141.7 (139.7 - 143.7)         | 20985/13682690    | 153.37 (151.3 - 155.4)        | 25291/15394374    | 164.29 (162.26 - 166.31)      |

CI indicates confidence interval.

**Table S2. Age-adjusted cardiovascular mortality rates related to atrial fibrillation by age and race-sex groups in the US, 2011-2018**  
AAMR indicates age-adjusted mortality rate; CI, confidence interval.

| Age Group   | Race-Sex Group | 2011                      | 2014                | 2018                  | 2011 - 2018                            |
|-------------|----------------|---------------------------|---------------------|-----------------------|----------------------------------------|
|             |                | N = 27,850                | N = 32,929          | N = 41,862            | Average Annual Percent Change (95% CI) |
|             |                | AAMR per 100,000 (95% CI) |                     |                       |                                        |
| 35-84 years | Total          | 18.0 (17.8 – 18.2)        | 19.8 (19.6 – 20.1)  | 22.3 (22.1 – 22.5)    | 3.4 (3.0 – 3.7)                        |
|             | Black women    | 12.3 (11.5 – 13.0)        | 14.4 (13.6 – 15.1)  | 15.9 (15.2 – 16.7)    | 3.0 (2.2 – 3.8)                        |
|             | White women    | 16.2 (15.9 – 16.5)        | 16.9 (16.6 – 17.2)  | 18.2 (17.9 – 18.5)    | 2.0 (1.6 – 2.5)                        |
|             | Black men      | 17.2 (16.2 – 18.3)        | 20.9 (19.8 – 22.1)  | 25.2 (24.1 – 26.3)    | 5.2 (4.5 – 6.0)                        |
|             | White men      | 21.7 (21.3 – 22.1)        | 24.9 (24.6 – 25.3)  | 28.7 (28.3 – 29.1)    | 4.4 (4.1 – 4.8)                        |
| 35-64 years | Total          | 2.0 (1.9 – 2.1)           | 2.5 (2.4 – 2.6)     | 3.2 (3.1 – 3.3)       | 7.4 (6.8 – 8.0)                        |
|             | Black women    | 2.1 (1.8 – 2.3)           | 2.6 (2.3 – 2.9)     | 2.9 (2.5 – 3.2)       | 3.3 (2.6 – 4.0)                        |
|             | White women    | 1.1 (1.0 – 1.1)           | 1.2 (1.1 – 1.3)     | 1.6 (1.5 – 1.7)       | 6.1 (4.6 – 7.6)                        |
|             | Black men      | 4.2 (3.8 – 4.7)           | 4.9 (4.5 – 5.4)     | 7.2 (6.7 – 7.8)       | 7.8 (6.3 – 9.3)                        |
|             | White men      | 2.7 (2.6 – 2.9)           | 3.5 (3.3 – 3.6)     | 4.3 (4.1 – 4.5)       | 7.3 (6.6 – 7.9)                        |
| 65-84 years | Total          | 75.0 (74.0 – 75.9)        | 82.2 (81.2 – 83.1)  | 91.1 (90.1 – 92.0)    | 3.0 (2.6 – 3.4)                        |
|             | Black women    | 47.7 (44.5 – 50.9)        | 55.3 (52.0 – 58.6)  | 61.3 (58.1 – 64.6)    | 3.5 (2.6 – 4.4)                        |
|             | White women    | 68.8 (67.5 – 70.1)        | 71.3 (70.1 – 72.6)  | 76.0 (74.8 – 77.3)    | 1.9 (1.4 – 2.4)                        |
|             | Black men      | 62.4 (57.9 – 67.0)        | 76.5 (71.7 – 81.3)  | 87.4 (82.8 – 92.1)    | 4.3 (3.4 – 5.2)                        |
|             | White men      | 87.4 (85.8 – 89.0)        | 99.5 (97.9 – 101.2) | 113.5 (111.8 – 115.2) | 4.1 (3.7 – 4.5)                        |

The AAMR indicates rate per 100,000 population, directly standardized to the 2000 US Census population.

**Table S3. Trends in age-adjusted mortality rates and average annual percent change for cardiovascular mortality related to atrial fibrillation by leading cardiovascular disease and racial subtype as underlying cause of death, 2011-2018.**

| CVD category  | 2011         |                       | 2014          |                       | 2018          |                       | 2011-2018                              |
|---------------|--------------|-----------------------|---------------|-----------------------|---------------|-----------------------|----------------------------------------|
|               | N (%)        | AAMR (95% CI)         | N (%)         | AAMR (95% CI)         | N (%)         | AAMR (95% CI)         | Average Annual Percent Change (95% CI) |
| <b>HHD</b>    | 2059 (100)   | 1.31<br>(1.25 – 1.37) | 2560 (100)    | 1.53<br>(1.47 – 1.59) | 4132 (100)    | 2.21<br>(2.14 – 2.28) | 8.1<br>(7.2 – 9.0)                     |
| <b>Black</b>  | 278 (13.5)   | 1.85<br>(1.63 – 2.08) | 333 (13.0)    | 2.00<br>(1.78 – 2.22) | 523 (12.7)    | 2.60<br>(2.37 – 2.83) | 5.1<br>(6.6 – 8.7)                     |
| <b>White</b>  | 1,731 (84.1) | 1.28<br>(1.22 – 1.34) | 2,149 (83.9)  | 1.52<br>(1.46 – 1.59) | 3,473 (84.1)  | 2.17<br>(2.1 – 2.25)  | 8.5<br>(7.5 – 9.4)                     |
| <b>IHD</b>    | 10245 (100)  | 6.61<br>(6.48 – 6.73) | 11867 (100)   | 7.14<br>(7.01 – 7.26) | 15139 (100)   | 8.05<br>(7.92 – 8.18) | 2.9<br>(2.3 – 3.5)                     |
| <b>Black</b>  | 677 (6.6)    | 4.65<br>(4.29 – 5.01) | 873 (7.4)     | 5.26<br>(4.9 – 5.62)  | 1,173 (7.7)   | 6.05<br>(5.69 – 6.41) | 3.6<br>(2.8 – 4.3)                     |
| <b>White</b>  | 9,321 (91.0) | 6.98<br>(6.84 – 7.12) | 10,696 (90.1) | 7.55<br>(7.4 – 7.69)  | 13,529 (89.4) | 8.54<br>(8.39 – 8.69) | 3.0<br>(2.4 – 3.6)                     |
| <b>Stroke</b> | 4120 (100)   | 2.70<br>(2.61 – 2.78) | 4292 (100)    | 2.60<br>(2.52 – 2.68) | 5223 (100)    | 2.82<br>(2.74 – 2.90) | 1.2<br>(0.7 – 1.7)                     |
| <b>Black</b>  | 318 (7.7)    | 2.15<br>(1.90 – 2.39) | 395 (9.2)     | 2.42<br>(2.17 – 2.66) | 507 (9.7)     | 2.71<br>(2.46 – 2.95) | 3.5<br>(1.6 – 5.4)                     |
| <b>White</b>  | 3,633 (88.9) | 2.75<br>(2.66 – 2.84) | 3,710 (86.4)  | 2.63<br>(2.55 – 2.72) | 4,480 (85.8)  | 2.86<br>(2.77 – 2.94) | 0.7<br>(-0.5 – 1.9)                    |

AAMR indicates age-adjusted mortality rate; AAPC, average annual percent change; CI, confidence interval; CVD, cardiovascular disease; HHD, hypertensive disease; IHD, ischemic heart disease

The AAMR indicates rate per 100,000 population, directly standardized to the 2000 US Census population.

Each CVD category was defined based on the following ICD-10 codes: HHD (I10-15), IHD (I20-25), and Stroke (I60-69).
